# Supplementary material for: Health Care and Behavioral Service Use by Medicaid-Enrolled Adults After Release From Incarceration
Source: Atypon-hosted journal article supplement (doi:10.1176/appi.ps.202200035), 2022-07-20
Supplement: appi.ps.202200035.ds001.pdf [file appi.ps.202200035.ds001.pdf]

Codes used to define each of the five types of utilization outcomes

| Outcome                                                      | Codes                                                                                                                                                                                             |
|--------------------------------------------------------------|---------------------------------------------------------------------------------------------------------------------------------------------------------------------------------------------------|
| Hospitalization                                              | CPT procedure codes 99217-99226, 99231-99236, 99238, 99239, 99251-99255                                                                                                                           |
| Emergency Department (ED)                                    | CPT procedure codes 99281-99288                                                                                                                                                                   |
| Office visit                                                 | CPT procedure codes 99201-99205, 99211-99215                                                                                                                                                      |
| High-acuity mental health or substance use disorder services | CCS diagnosis categories 660, 650, 651, 656, 657, 658, 659, 661, 662, 670<br><br>OR<br><br>CCS procedure categories 218, 219<br><br>AND<br><br>Encounter meets criteria for hospitalization OR ED |
| Low-acuity mental health or substance use disorder services  | CCS diagnosis categories 660, 650, 651, 656, 657, 658, 659, 661, 662, 670<br><br>OR<br><br>CCS procedure categories 218, 219<br><br>AND<br><br>Encounter is not a hospitalization OR ED           |

Supplement Table 1. Utilization for those released in 2016 or before

| Utilization                                | Total<br>(N= 8,534 releases) |      | Early enrollment<br>(N= 3,863 releases) |      | Late enrollment (N=<br>4,672 releases) |      | p     |
|--------------------------------------------|------------------------------|------|-----------------------------------------|------|----------------------------------------|------|-------|
|                                            | N                            | %    | N                                       | %    | N                                      | %    |       |
| ■ All-cause emergency department encounter | 4,131                        | 48.4 | 1,811                                   | 46.9 | 2,320                                  | 49.7 | .010  |
| ■ All-cause hospitalization                | 668                          | 7.8  | 337                                     | 8.7  | 331                                    | 7.1  | .005  |
| ■ All outpatient                           | 4,392                        | 51.5 | 2,194                                   | 56.8 | 2,198                                  | 47.1 | <.001 |
| ■ Subacute behavioral health encounter     | 3,062                        | 35.9 | 1,468                                   | 38.0 | 1,594                                  | 34.1 | <.001 |
| ■ Acute behavioral health encounter        | 1,538                        | 18.0 | 666                                     | 17.2 | 872                                    | 18.7 | .088  |
| ■ Any utilization                          | 6,688                        | 78.4 | 3,094                                   | 80.1 | 3,594                                  | 76.9 | <.001 |
| First service type <sup>a</sup>            |                              |      |                                         |      |                                        |      |       |
| ■ All-cause emergency department           | 2,880                        | 40.9 | 1,202                                   | 36.6 | 1,678                                  | 44.7 | <.001 |
| ■ All-cause hospitalization                | 161                          | 2.3  | 90                                      | 2.7  | 71                                     | 1.9  | .018  |
| ■ Outpatient                               | 2,538                        | 36.0 | 1,252                                   | 38.1 | 1,286                                  | 34.3 | .001  |
| ■ Subacute behavioral health encounter     | 1,898                        | 26.9 | 838                                     | 25.5 | 1,060                                  | 28.2 | .009  |
| ■ Acute behavioral health encounter        | 640                          | 9.1  | 252                                     | 7.7  | 388                                    | 10.3 | <.001 |

<sup>a</sup> First service type utilization relies on a smaller denominator of those with any utilization. Denominators for first service type measures also vary slightly depending on data availability.

Supplement Table 2. Utilization for those released after 2016

| Utilization                                | Total<br>(N= 7,913 releases) |      | Early enrollment<br>(N= 5,498 releases) |      | Late enrollment (N=<br>2,415 releases) |      | p    |
|--------------------------------------------|------------------------------|------|-----------------------------------------|------|----------------------------------------|------|------|
|                                            | N                            | %    | N                                       | %    | N                                      | %    |      |
| ■ All-cause emergency department encounter | 3,686                        | 46.6 | 2,517                                   | 45.8 | 1,169                                  | 48.4 | .031 |
| ■ All-cause hospitalization                | 513                          | 6.5  | 340                                     | 6.2  | 173                                    | 7.2  | .103 |
| ■ All outpatient                           | 4,344                        | 54.9 | 3,007                                   | 54.7 | 1,337                                  | 55.4 | .581 |
| ■ Subacute behavioral health encounter     | 3,502                        | 44.3 | 2,422                                   | 44.1 | 1,080                                  | 44.7 | .582 |
| ■ Acute behavioral health encounter        | 1,653                        | 20.9 | 1,093                                   | 19.9 | 560                                    | 23.2 | .001 |
| ■ Any utilization                          | 6,579                        | 83.1 | 4,538                                   | 82.5 | 2,041                                  | 84.5 | .031 |
| First service type <sup>a</sup>            |                              |      |                                         |      |                                        |      |      |
| ■ All-cause emergency department           | 2,507                        | 36.3 | 1,751                                   | 36.9 | 756                                    | 35.1 | .165 |
| ■ All-cause hospitalization                | 97                           | 1.4  | 72                                      | 1.5  | 25                                     | 1.2  | .247 |
| ■ Outpatient                               | 2,567                        | 37.2 | 1,743                                   | 36.7 | 824                                    | 38.3 | .205 |
| ■ Subacute behavioral health encounter     | 2,329                        | 33.7 | 1,565                                   | 32.9 | 764                                    | 35.5 | .038 |
| ■ Acute behavioral health encounter        | 780                          | 11.3 | 524                                     | 11.0 | 256                                    | 11.9 | .294 |

<sup>a</sup> First service type utilization relies on a smaller denominator of those with any utilization. Denominators for first service type measures also vary slightly depending on data availability.
